# Supplementary material for: Global source apportionment of aerosols into major emission regions and sectors over 1850–2017
Source: Copernicus journal article supplement (doi:10.5194/egusphere-2023-2552), 2024-01-05
Supplement: Supplementary file 1 [file egusphere-2023-2552-supplement.pdf]

1 Global source apportionment of aerosols into major emission regions  
2 and sectors over 1850–2017

3  
4  
5 Yang Yang<sup>1\*</sup>, Shaoxuan Mou<sup>1</sup>, Hailong Wang<sup>2</sup>, Pinya Wang<sup>1</sup>, Baojie Li<sup>1</sup>, Hong Liao<sup>1</sup>

6  
7  
8  
9 <sup>1</sup>Joint International Research Laboratory of Climate and Environment Change (ILCEC),  
10 Jiangsu Key Laboratory of Atmospheric Environment Monitoring and Pollution Control,  
11 Jiangsu Collaborative Innovation Center of Atmospheric Environment and Equipment  
12 Technology, School of Environmental Science and Engineering, Nanjing University of  
13 Information Science and Technology, Nanjing, Jiangsu, China

14 <sup>2</sup>Atmospheric, Climate, and Earth Sciences Division, Pacific Northwest National Laboratory,  
15 Richland, Washington, USA

16  
17  
18  
19  
20  
21 Correspondence to [yang.yang@nuist.edu.cn](mailto:yang.yang@nuist.edu.cn)

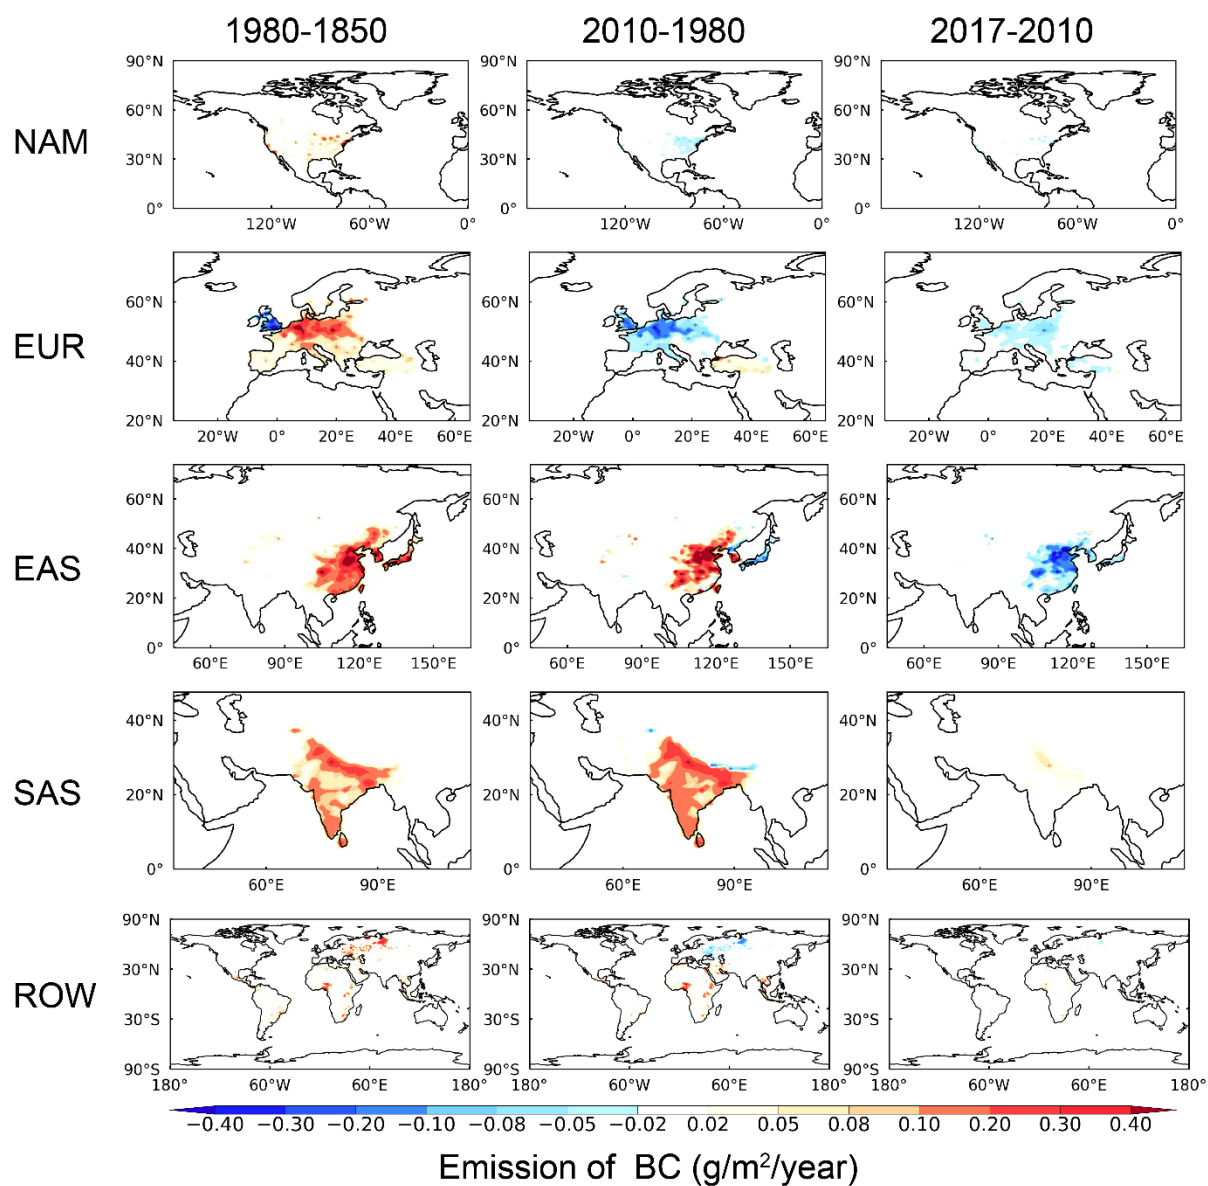

23

24 **Figure S1.** Changes in anthropogenic emissions of black carbon (BC) between 1850  
 25 and 1980 (left), between 1980 and 2010 (middle), and between 2010 and 2017 (right)  
 26 in the 5 tagged source regions (NAM, EUR, EAS, SAS and ROW from top to bottom).

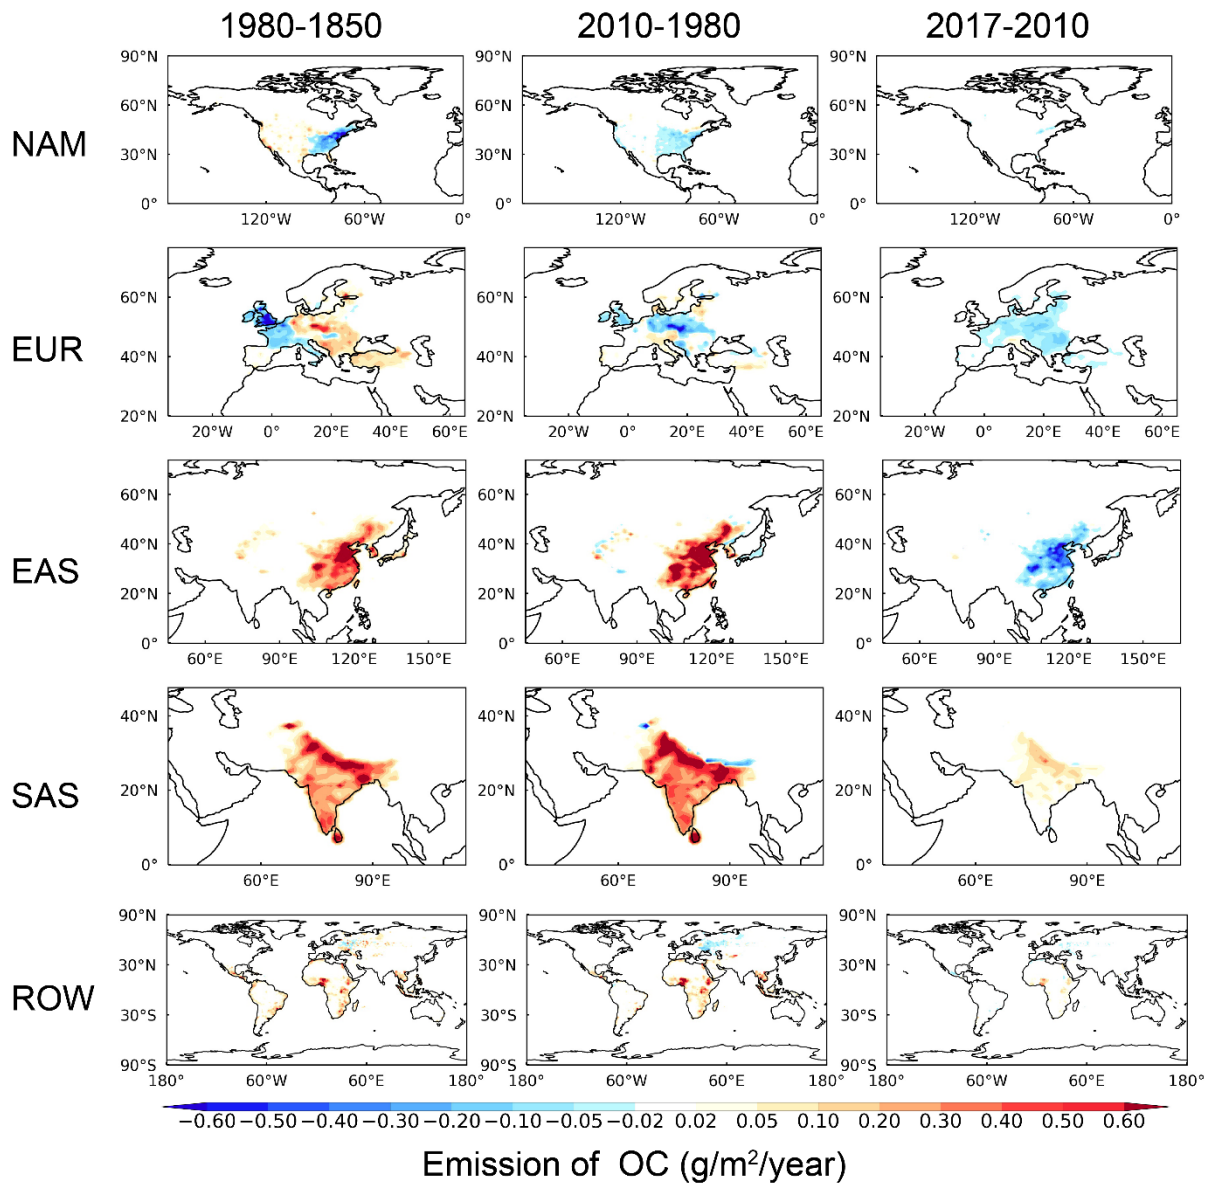

27

28 **Figure S2.** Changes in anthropogenic emissions of organic carbon (OC) between  
 29 1850 and 1980 (left), between 1980 and 2010 (middle), and between 2010 and 2017  
 30 (right) in the 5 tagged source regions (NAM, EUR, EAS, SAS and ROW from top to  
 31 bottom).
